# Supplementary material for: Cold plasma selectivity and the possibility of a paradigm shift in cancer therapy
Source: PubMed Central journal article supplement (PMC3241555; doi:10.1038/bjc.2011.386), 2011-10-06

**Supplementary Table 1.** Differentially expressed genes after plasma application

| <b>SYMBOL</b> | <b>Fold change</b> | <b>Regulation</b> | <b>Entrez Gene Name</b>                                              | <b>Location</b>     |
|---------------|--------------------|-------------------|----------------------------------------------------------------------|---------------------|
| AADAACL2      | -5.2               | down              | arylacetamide deacetylase-like 2                                     | unknown             |
| ABCG4         | -5.0               | down              | ATP-binding cassette, sub-family G (WHITE), member 4                 | Plasma Membrane     |
| ABHD5         | -5.2               | down              | abhydrolase domain containing 5                                      | Cytoplasm           |
| ACSBG1        | -4.6               | down              | acyl-CoA synthetase bubblegum family member 1                        | Cytoplasm           |
| ADAM8         | 42.9               | up                | ADAM metallopeptidase domain 8                                       | Plasma Membrane     |
| ADAMTS1       | 5.1                | up                | ADAM metallopeptidase with thrombospondin type 1 motif, 1            | Extracellular Space |
| AFAP1L1       | -4.5               | down              | actin filament associated protein 1-like 1                           | unknown             |
| AIF1          | 5.4                | up                | allograft inflammatory factor 1                                      | Nucleus             |
| ALDH1A3       | 6.1                | up                | aldehyde dehydrogenase 1 family, member A3                           | Cytoplasm           |
| ALDOA         | 4.8                | up                | aldolase A, fructose-bisphosphate                                    | Cytoplasm           |
| AMY1A         | 6.8                | up                | amylase, alpha 1A (salivary)                                         | Extracellular Space |
| AMY1B         | 4.6                | up                | amylase, alpha 1B (salivary)                                         | unknown             |
| ANKRD37       | 6.8                | up                | ankyrin repeat domain 37                                             | unknown             |
| APCDD1        | -8.7               | down              | adenomatosis polyposis coli down-regulated 1                         | unknown             |
| APOBEC3B      | 4.0                | up                | apolipoprotein B mRNA editing enzyme, catalytic polypeptide-like 3B  | Cytoplasm           |
| ARG1          | -12.7              | down              | arginase, liver                                                      | Cytoplasm           |
| ARHGEF16      | 8.1                | up                | Rho guanine nucleotide exchange factor (GEF) 16                      | Cytoplasm           |
| ARHGEF5L      | -4.2               | down              | Rho guanine nucleotide exchange factor (GEF) 35                      | unknown             |
| ASF1B         | 4.1                | up                | ASF1 anti-silencing function 1 homolog B ( <i>S. cerevisiae</i> )    | Nucleus             |
| ASS1          | 4.5                | up                | argininosuccinate synthase 1                                         | Cytoplasm           |
| ATP2A1        | -77.0              | down              | ATPase, Ca <sup>++</sup> transporting, cardiac muscle, fast twitch 1 | Cytoplasm           |
| ATP6V1C1      | -4.9               | down              | ATPase, H <sup>+</sup> transporting, lysosomal 42kDa, V1 subunit C1  | Cytoplasm           |
| AVEN          | -4.2               | down              | apoptosis, caspase activation inhibitor                              | Cytoplasm           |
| B3GNT5        | -4.4               | down              | UDP-GlcNAc:betaGal beta-1,3-N-acetylglucosaminyltransferase 5        | unknown             |
| BAG1          | -4.0               | down              | BCL2-associated athanogene                                           | Cytoplasm           |
| BAHD1         | 21.7               | up                | bromo adjacent homology domain containing 1                          | unknown             |
| BBOX1         | 4.3                | up                | butyrobetaine (gamma), 2-oxoglutarate dioxygenase                    | Cytoplasm           |
| BCHE          | 44.0               | up                | butyrylcholinesterase                                                | Plasma Membrane     |
| BCL6          | -4.5               | down              | B-cell CLL/lymphoma 6                                                | Nucleus             |
| BGN           | 5.8                | up                | biglycan                                                             | Extracellular Space |
| BST2          | 4.2                | up                | bone marrow stromal cell antigen 2                                   | Plasma Membrane     |
| BTN2A2        | -29.8              | down              | butyrophilin, subfamily 2, member A2                                 | unknown             |
| C10orf10      | 7.8                | up                | chromosome 10 open reading frame 10                                  | Cytoplasm           |

**Supplementary Table 1.** Differentially expressed genes after plasma application

| <b>SYMBOL</b> | <b>Fold change</b> | <b>Regulation</b> | <b>Entrez Gene Name</b>                                                   | <b>Location</b>     |
|---------------|--------------------|-------------------|---------------------------------------------------------------------------|---------------------|
| C13orf15      | -5.3               | down              | chromosome 13 open reading frame 15                                       | Cytoplasm           |
| C15orf48      | 5.8                | up                | chromosome 15 open reading frame 48                                       | Nucleus             |
| C19orf10      | 4.7                | up                | chromosome 19 open reading frame 10                                       | Extracellular Space |
| C1orf110      | 52.6               | up                | chromosome 1 open reading frame 110                                       | unknown             |
| C2orf55       | 6.1                | up                | chromosome 2 open reading frame 55                                        | unknown             |
| C6orf15       | -4.2               | down              | chromosome 6 open reading frame 15                                        | Extracellular Space |
| C6orf188      | -49.3              | down              | family with sequence similarity 26, member E                              | unknown             |
| C9orf37       | 7.8                | up                | chromosome 9 open reading frame 37                                        | unknown             |
| C9orf41       | -4.1               | down              | chromosome 9 open reading frame 41                                        | unknown             |
| CA6           | -80.0              | down              | carbonic anhydrase VI                                                     | Extracellular Space |
| CADM1         | -9.3               | down              | cell adhesion molecule 1                                                  | Plasma Membrane     |
| CAMTA1        | -29.6              | down              | calmodulin binding transcription activator 1                              | unknown             |
| CCDC85B       | 4.0                | up                | coiled-coil domain containing 85B                                         | unknown             |
| CCDC90A       | -4.5               | down              | coiled-coil domain containing 90A                                         | unknown             |
| CCDC99        | 6.4                | up                | coiled-coil domain containing 99                                          | unknown             |
| CCL27         | -7.0               | down              | chemokine (C-C motif) ligand 27                                           | Extracellular Space |
| CCNA1         | -4.6               | down              | cyclin A1                                                                 | Nucleus             |
| CD74          | 227.8              | up                | CD74 molecule, major histocompatibility complex, class II invariant chain | Plasma Membrane     |
| CDT1          | 6.7                | up                | chromatin licensing and DNA replication factor 1                          | Nucleus             |
| CEACAM6       | 9.3                | up                | carcinoembryonic antigen-related cell adhesion molecule 6                 | Plasma Membrane     |
| CENTD2        | 4.2                | up                | ArfGAP with RhoGAP domain, ankyrin repeat and PH domain 1                 | Cytoplasm           |
| CFH           | 8.1                | up                | complement factor H                                                       | Extracellular Space |
| CGNL1         | 8.9                | up                | cingulin-like 1                                                           | unknown             |
| CHPT1         | -4.6               | down              | choline phosphotransferase 1                                              | unknown             |
| CHRNA9        | -25.3              | down              | cholinergic receptor, nicotinic, alpha 9                                  | Plasma Membrane     |
| CLOCK         | 4.8                | up                | clock homolog (mouse)                                                     | Nucleus             |
| CNTNAP2       | -9.4               | down              | contactin associated protein-like 2                                       | Plasma Membrane     |
| COBL          | 5.0                | up                | cordon-bleu homolog (mouse)                                               | unknown             |
| CORO6         | -4.9               | down              | coronin 6                                                                 | unknown             |
| CPVL          | 9.3                | up                | carboxypeptidase, vitellogenic-like                                       | unknown             |
| CSF2          | 7.9                | up                | colony stimulating factor 2 (granulocyte-macrophage)                      | Extracellular Space |
| CSNK2A2       | -4.2               | down              | casein kinase 2, alpha prime polypeptide                                  | Cytoplasm           |
| CTXN1         | 5.0                | up                | cortexin 1                                                                | unknown             |

**Supplementary Table 1.** Differentially expressed genes after plasma application

| <b>SYMBOL</b> | <b>Fold change</b> | <b>Regulation</b> | <b>Entrez Gene Name</b>                                    | <b>Location</b>     |
|---------------|--------------------|-------------------|------------------------------------------------------------|---------------------|
| CYBRD1        | -8.2               | down              | cytochrome b reductase 1                                   | Cytoplasm           |
| CYFIP2        | -66.7              | down              | cytoplasmic FMR1 interacting protein 2                     | Cytoplasm           |
| CYR61         | 4.1                | up                | cysteine-rich, angiogenic inducer, 61                      | Extracellular Space |
| DAZ2          | 41.0               | up                | deleted in azoospermia 2                                   | Cytoplasm           |
| DAZ4          | 755.5              | up                | deleted in azoospermia 4                                   | Cytoplasm           |
| DBP           | 11.7               | up                | D site of albumin promoter (albumin D-box) binding protein | Nucleus             |
| DCPS          | 4.6                | up                | decapping enzyme, scavenger                                | Nucleus             |
| DEFB103B      | 5.8                | up                | defensin, beta 103B                                        | Extracellular Space |
| DHRS9         | 4.8                | up                | dehydrogenase/reductase (SDR family) member 9              | Cytoplasm           |
| DMRT2         | 10.5               | up                | doublesex and mab-3 related transcription factor 2         | Nucleus             |
| DNER          | -34.7              | down              | delta/notch-like EGF repeat containing                     | Plasma Membrane     |
| DUSP1         | -4.3               | down              | dual specificity phosphatase 1                             | Nucleus             |
| EDG7          | 6.0                | up                | lysophosphatidic acid receptor 3                           | Plasma Membrane     |
| EEF1A2        | -29.0              | down              | eukaryotic translation elongation factor 1 alpha 2         | Cytoplasm           |
| FAM128A       | 27.9               | up                | mitotic spindle organizing protein 2A                      | unknown             |
| FAM13A        | -4.3               | down              | family with sequence similarity 13, member A               | unknown             |
| FAM181B       | 5.3                | up                | family with sequence similarity 181, member B              | unknown             |
| FETUB         | -5.2               | down              | fetuin B                                                   | Extracellular Space |
| FKBP2         | 4.4                | up                | FK506 binding protein 2, 13kDa                             | Cytoplasm           |
| FKBP5         | -11.0              | down              | FK506 binding protein 5                                    | Nucleus             |
| FLG2          | -7.1               | down              | filaggrin family member 2                                  | unknown             |
| FOXA2         | 21.9               | up                | forkhead box A2                                            | Nucleus             |
| GAA           | 4.6                | up                | glucosidase, alpha; acid                                   | Cytoplasm           |
| GBP6          | 6.1                | up                | guanylate binding protein family, member 6                 | unknown             |
| GJC2          | 13.9               | up                | gap junction protein, gamma 2, 47kDa                       | Plasma Membrane     |
| GLCC11        | -10.5              | down              | glucocorticoid induced transcript 1                        | unknown             |
| GLRX          | -8.5               | down              | glutaredoxin (thioltransferase)                            | Cytoplasm           |
| GPX7          | -114.9             | down              | glutathione peroxidase 7                                   | Cytoplasm           |
| GUCA2A        | -16.9              | down              | guanylate cyclase activator 2A (guanylin)                  | Extracellular Space |
| HAL           | -5.0               | down              | histidine ammonia-lyase                                    | Cytoplasm           |
| HAS3          | 5.5                | up                | hyaluronan synthase 3                                      | Plasma Membrane     |
| HBEGF         | 6.0                | up                | heparin-binding EGF-like growth factor                     | Extracellular Space |
| HCLS1         | -113.5             | down              | hematopoietic cell-specific Lyn substrate 1                | Nucleus             |

**Supplementary Table 1.** Differentially expressed genes after plasma application

| <b>SYMBOL</b> | <b>Fold change</b> | <b>Regulation</b> | <b>Entrez Gene Name</b>                                             | <b>Location</b>     |
|---------------|--------------------|-------------------|---------------------------------------------------------------------|---------------------|
| HIST1H2AB     | -5.7               | down              | histone cluster 1, H2ab                                             | Nucleus             |
| HIST1H2AE     | -8.9               | down              | histone cluster 1, H2ae                                             | Nucleus             |
| HLA-DPA1      | 41.3               | up                | major histocompatibility complex, class II, DP alpha 1              | Plasma Membrane     |
| HLA-DQA1      | 135.9              | up                | major histocompatibility complex, class II, DQ alpha 1              | Plasma Membrane     |
| HLA-DRA       | 4.7                | up                | major histocompatibility complex, class II, DR alpha                | Plasma Membrane     |
| HLA-DRB1      | 12.6               | up                | major histocompatibility complex, class II, DR beta 1               | Plasma Membrane     |
| HLA-DRB6      | 18.8               | up                | major histocompatibility complex, class II, DR beta 6 (pseudogene)  | unknown             |
| HMGB3         | -6.0               | down              | high-mobility group box 3                                           | Nucleus             |
| HNRNPF        | -49.3              | down              | heterogeneous nuclear ribonucleoprotein F                           | Nucleus             |
| HNRNPUL2      | 5.0                | up                | heterogeneous nuclear ribonucleoprotein U-like 2                    | Nucleus             |
| HNRPLL        | -4.0               | down              | heterogeneous nuclear ribonucleoprotein L-like                      | unknown             |
| HOMER2        | -5.6               | down              | homer homolog 2 (Drosophila)                                        | Plasma Membrane     |
| HPGD          | -6.0               | down              | hydroxyprostaglandin dehydrogenase 15-(NAD)                         | Cytoplasm           |
| HRNR          | -8.2               | down              | hornerin                                                            | Cytoplasm           |
| HSPA14        | -4.1               | down              | heat shock 70kDa protein 14                                         | Cytoplasm           |
| HSPB3         | -4.9               | down              | heat shock 27kDa protein 3                                          | unknown             |
| ICAM2         | 66.0               | up                | intercellular adhesion molecule 2                                   | Plasma Membrane     |
| IDI1          | -4.7               | down              | isopentenyl-diphosphate delta isomerase 1                           | Cytoplasm           |
| IER3          | 4.1                | up                | immediate early response 3                                          | Cytoplasm           |
| IGFBP2        | 5.7                | up                | insulin-like growth factor binding protein 2, 36kDa                 | Extracellular Space |
| IL1F9         | 16.4               | up                | interleukin 1 family, member 9                                      | Extracellular Space |
| IL1R1         | -49.4              | down              | interleukin 1 receptor, type I                                      | Plasma Membrane     |
| IL1RL1        | 32.2               | up                | interleukin 1 receptor-like 1                                       | Plasma Membrane     |
| IL8           | 12.9               | up                | interleukin 8                                                       | Extracellular Space |
| ITFG2         | -4.3               | down              | integrin alpha FG-GAP repeat containing 2                           | unknown             |
| ITPRIPL2      | 4.3                | up                | inositol 1,4,5-triphosphate receptor interacting protein-like 2     | unknown             |
| JMY           | -5.0               | down              | junction mediating and regulatory protein, p53 cofactor             | Nucleus             |
| KCNQ1OT1      | -5.5               | down              | KCNQ1 overlapping transcript 1 (non-protein coding)                 | unknown             |
| KHDRBS3       | 5.6                | up                | KH domain containing, RNA binding, signal transduction associated 3 | Nucleus             |
| KPNA7         | 4.8                | up                | karyopherin alpha 7 (importin alpha 8)                              | unknown             |
| KRT13         | 6.3                | up                | keratin 13                                                          | Cytoplasm           |
| KRT2          | 110.5              | up                | keratin 2                                                           | Cytoplasm           |
| KRT37         | 4.3                | up                | keratin 37                                                          | Cytoplasm           |

**Supplementary Table 1.** Differentially expressed genes after plasma application

| <b>SYMBOL</b> | <b>Fold change</b> | <b>Regulation</b> | <b>Entrez Gene Name</b>                                            | <b>Location</b>     |
|---------------|--------------------|-------------------|--------------------------------------------------------------------|---------------------|
| KRTAP19-6     | -5.0               | down              | keratin associated protein 19-6                                    | unknown             |
| KRTAP21-2     | -19.2              | down              | keratin associated protein 21-2                                    | unknown             |
| KRTAP6-3      | -18.5              | down              | keratin associated protein 6-3                                     | unknown             |
| KRTAP7-1      | -5.7               | down              | keratin associated protein 7-1 (gene/pseudogene)                   | unknown             |
| LCE2B         | -6.7               | down              | late cornified envelope 2B                                         | unknown             |
| LCE2C         | -8.6               | down              | late cornified envelope 2C                                         | unknown             |
| LCE2D         | -9.7               | down              | late cornified envelope 2D                                         | unknown             |
| LCE6A         | -4.4               | down              | late cornified envelope 6A                                         | unknown             |
| LCP1          | 15.7               | up                | lymphocyte cytosolic protein 1 (L-plastin)                         | Cytoplasm           |
| LIPM          | -5.1               | down              | lipase, family member M                                            | Extracellular Space |
| LY6G6C        | -4.4               | down              | lymphocyte antigen 6 complex, locus G6C                            | Extracellular Space |
| LYG1          | -28.0              | down              | lysozyme G-like 1                                                  | Extracellular Space |
| LYPD1         | 4.8                | up                | LY6/PLAUR domain containing 1                                      | Plasma Membrane     |
| LYPD6B        | -4.9               | down              | LY6/PLAUR domain containing 6B                                     | unknown             |
| MAGEA1        | 7.1                | up                | melanoma antigen family A, 1 (directs expression of antigen MZ2-E) | Plasma Membrane     |
| MB            | 59.1               | up                | myoglobin                                                          | Cytoplasm           |
| MIR1974       | 9.1                | up                | microRNA 1974                                                      | unknown             |
| MIR574        | -5.4               | down              | microRNA 574                                                       | unknown             |
| MSMB          | -30.4              | down              | microseminoprotein, beta-                                          | Extracellular Space |
| MT1M          | -6.8               | down              | metallothionein 1M                                                 | unknown             |
| MT4           | -7.0               | down              | metallothionein 4                                                  | unknown             |
| MYL1          | -6.6               | down              | myosin, light chain 1, alkali; skeletal, fast                      | Cytoplasm           |
| NBPF20        | 4.4                | up                | neuroblastoma breakpoint family member                             | unknown             |
| NDRG2         | 7.9                | up                | NDRG family member 2                                               | Cytoplasm           |
| NDST1         | 5.2                | up                | N-deacetylase/N-sulfotransferase (heparan glucosaminyl) 1          | Cytoplasm           |
| NEB           | -6.9               | down              | nebulin                                                            | Cytoplasm           |
| NHLH2         | -4.3               | down              | nescient helix loop helix 2                                        | Nucleus             |
| NRTN          | -32.7              | down              | neurturin                                                          | Extracellular Space |
| OGFRL1        | -9.3               | down              | opioid growth factor receptor-like 1                               | unknown             |
| OTUB2         | -50.4              | down              | OTU domain, ubiquitin aldehyde binding 2                           | unknown             |
| PADI3         | 45.6               | up                | peptidyl arginine deiminase, type III                              | Cytoplasm           |
| PCDH21        | -40.6              | down              | cadherin-related family member 1                                   | Plasma Membrane     |
| PHLDA1        | 5.6                | up                | pleckstrin homology-like domain, family A, member 1                | Cytoplasm           |

**Supplementary Table 1.** Differentially expressed genes after plasma application

| <b>SYMBOL</b> | <b>Fold change</b> | <b>Regulation</b> | <b>Entrez Gene Name</b>                                      | <b>Location</b>     |
|---------------|--------------------|-------------------|--------------------------------------------------------------|---------------------|
| PIK3R1        | -10.7              | down              | phosphoinositide-3-kinase, regulatory subunit 1 (alpha)      | Cytoplasm           |
| PLA2G4A       | 46.3               | up                | phospholipase A2, group IVA (cytosolic, calcium-dependent)   | Cytoplasm           |
| PLA2G4F       | -6.0               | down              | phospholipase A2, group IVF                                  | Cytoplasm           |
| PLAG1         | -4.5               | down              | pleiomorphic adenoma gene 1                                  | Nucleus             |
| POLD1         | 70.8               | up                | polymerase (DNA directed), delta 1, catalytic subunit 125kDa | Nucleus             |
| PPAP2B        | 20.9               | up                | phosphatidic acid phosphatase type 2B                        | Plasma Membrane     |
| PPDPF         | 15.6               | up                | pancreatic progenitor cell differentiation                   | unknown             |
| PPFIA4        | 4.7                | up                | protein tyrosine phosphatase                                 | Plasma Membrane     |
| PRAME         | 29.0               | up                | preferentially expressed antigen in melanoma                 | Nucleus             |
| PRPF18        | -6.9               | down              | PRP18 pre-mRNA processing factor 18 homolog (S. cerevisiae)  | Nucleus             |
| PRR11         | 31.2               | up                | proline rich 11                                              | unknown             |
| PTGS2         | 7.5                | up                | prostaglandin-endoperoxide synthase 2                        | Cytoplasm           |
| PTPRU         | 4.8                | up                | protein tyrosine phosphatase, receptor type, U               | Plasma Membrane     |
| PYROXD1       | -4.5               | down              | pyridine nucleotide-disulphide oxidoreductase domain 1       | unknown             |
| RASD2         | 5.7                | up                | RASD family, member 2                                        | Cytoplasm           |
| RASIP1        | -7.2               | down              | Ras interacting protein 1                                    | Cytoplasm           |
| RCOR2         | 4.4                | up                | REST corepressor 2                                           | Nucleus             |
| REL           | -5.3               | down              | v-rel reticuloendotheliosis viral oncogene homolog (avian)   | Nucleus             |
| RETNLB        | -4.2               | down              | resistin like beta                                           | Extracellular Space |
| RIMS2         | -40.0              | down              | regulating synaptic membrane exocytosis 2                    | Cytoplasm           |
| RNF187        | 6.3                | up                | ring finger protein 187                                      | unknown             |
| ROBO1         | -6.3               | down              | roundabout, axon guidance receptor, homolog 1 (Drosophila)   | Plasma Membrane     |
| ROCK1         | -9.8               | down              | Rho-associated, coiled-coil containing protein kinase 1      | Cytoplasm           |
| RPIA          | -4.4               | down              | ribose 5-phosphate isomerase A                               | Cytoplasm           |
| RRAD          | -7.2               | down              | Ras-related associated with diabetes                         | Cytoplasm           |
| RUNX3         | 4.5                | up                | runt-related transcription factor 3                          | Nucleus             |
| S100A12       | 4.8                | up                | S100 calcium binding protein A12                             | Cytoplasm           |
| SAA1          | -4.1               | down              | serum amyloid A1                                             | Extracellular Space |
| SDSL          | 11.2               | up                | serine dehydratase-like                                      | unknown             |
| SEMA5A        | 5.2                | up                | sema domain, cytoplasmic domain, (semaphorin) 5A             | Plasma Membrane     |
| SEPP1         | 5.3                | up                | selenoprotein P, plasma, 1                                   | Extracellular Space |
| SESN1         | -4.8               | down              | sestrin 1                                                    | Nucleus             |
| SEZ6L2        | 6.3                | up                | seizure related 6 homolog (mouse)-like 2                     | unknown             |

**Supplementary Table 1.** Differentially expressed genes after plasma application

| <b>SYMBOL</b> | <b>Fold change</b> | <b>Regulation</b> | <b>Entrez Gene Name</b>                                            | <b>Location</b>     |
|---------------|--------------------|-------------------|--------------------------------------------------------------------|---------------------|
| SGPP2         | -4.7               | down              | sphingosine-1-phosphate phosphatase 2                              | Cytoplasm           |
| SH3PXD2B      | 27.3               | up                | SH3 and PX domains 2B                                              | unknown             |
| SIGIRR        | 8.4                | up                | single immunoglobulin and toll-interleukin 1 receptor (TIR) domain | Plasma Membrane     |
| SIGLEC12      | -4.9               | down              | sialic acid binding Ig-like lectin 12                              | Plasma Membrane     |
| SLC25A17      | -4.3               | down              | solute carrier family 25                                           | Cytoplasm           |
| SLC25A42      | 5.0                | up                | solute carrier family 25, member 42                                | unknown             |
| SLC29A4       | -41.6              | down              | solute carrier family 29 (nucleoside transporters), member 4       | Plasma Membrane     |
| SLC6A8        | 5.5                | up                | solute carrier family 6                                            | Cytoplasm           |
| SLC7A6        | -4.6               | down              | solute carrier family 7                                            | Plasma Membrane     |
| SMPD3         | -4.3               | down              | sphingomyelin phosphodiesterase 3                                  | Cytoplasm           |
| SNORD3A       | 4.1                | up                | small nucleolar RNA, C/D box 3A                                    | unknown             |
| SOX9          | 6.1                | up                | SRY (sex determining region Y)-box 9                               | Nucleus             |
| SPINK6        | 4.7                | up                | serine peptidase inhibitor, Kazal type 6                           | Extracellular Space |
| SPRR2A        | 9.7                | up                | small proline-rich protein 2A                                      | Cytoplasm           |
| SPRR2B        | 4.9                | up                | small proline-rich protein 2B                                      | Cytoplasm           |
| SRGAP3        | -4.0               | down              | SLIT-ROBO Rho GTPase activating protein 3                          | unknown             |
| STC2          | 7.7                | up                | stanniocalcin 2                                                    | Extracellular Space |
| STMN3         | 4.8                | up                | stathmin-like 3                                                    | Nucleus             |
| STRBP         | -5.5               | down              | spermatid perinuclear RNA binding protein                          | Cytoplasm           |
| STYXL1        | 5.4                | up                | serine/threonine/tyrosine interacting-like 1                       | unknown             |
| TCN1          | 7.5                | up                | transcobalamin I (vitamin B12 binding protein, R binder family)    | Cytoplasm           |
| TFPI2         | 5.4                | up                | tissue factor pathway inhibitor 2                                  | Extracellular Space |
| TGM3          | 6.3                | up                | transglutaminase 3                                                 | Cytoplasm           |
| TINAGL1       | 11.2               | up                | tubulointerstitial nephritis antigen-like 1                        | Extracellular Space |
| TLCD1         | -5.5               | down              | TLC domain containing 1                                            | unknown             |
| TMEM178       | -39.2              | down              | transmembrane protein 178                                          | unknown             |
| TNFRSF12A     | 5.9                | up                | tumor necrosis factor receptor superfamily, member 12A             | Plasma Membrane     |
| TNNT1         | 14.9               | up                | troponin T type 1 (skeletal, slow)                                 | unknown             |
| TNNT2         | -4.0               | down              | troponin T type 2 (cardiac)                                        | Cytoplasm           |
| TOX2          | -4.5               | down              | TOX high mobility group box family member 2                        | Nucleus             |
| TP53INP1      | -4.3               | down              | tumor protein p53 inducible nuclear protein 1                      | Nucleus             |
| TSC22D3       | -17.0              | down              | TSC22 domain family, member 3                                      | Nucleus             |
| TSHZ2         | -4.4               | down              | teashirt zinc finger homeobox 2                                    | unknown             |

**Supplementary Table 1.** Differentially expressed genes after plasma application

| <b>SYMBOL</b> | <b>Fold change</b> | <b>Regulation</b> | <b>Entrez Gene Name</b>                                   | <b>Location</b>     |
|---------------|--------------------|-------------------|-----------------------------------------------------------|---------------------|
| TSPAN10       | 6.7                | up                | tetraspanin 10                                            | unknown             |
| TYMP          | 4.9                | up                | thymidine phosphorylase                                   | Extracellular Space |
| UHRF1BP1L     | -4.2               | down              | UHRF1 binding protein 1-like                              | unknown             |
| USP12         | -4.6               | down              | ubiquitin specific peptidase 12                           | Cytoplasm           |
| USP19         | -4.0               | down              | ubiquitin specific peptidase 19                           | Cytoplasm           |
| VAMP5         | -5.3               | down              | vesicle-associated membrane protein 5 (myobrevin)         | Plasma Membrane     |
| VOPP1         | 4.9                | up                | vesicular, overexpressed in cancer, prosurvival protein 1 | Nucleus             |
| VTCN1         | 11.9               | up                | V-set domain containing T cell activation inhibitor 1     | Plasma Membrane     |
| VWA1          | 4.2                | up                | von Willebrand factor A domain containing 1               | Extracellular Space |
| WFDC12        | -4.5               | down              | WAP four-disulfide core domain 12                         | Extracellular Space |
| WNT11         | -24.2              | down              | wingless-type MMTV integration site family, member 11     | Extracellular Space |
| ZFP37         | -7.5               | down              | zinc finger protein 37 homolog (mouse)                    | Nucleus             |
| ZNF259        | -4.4               | down              | zinc finger protein 259                                   | Nucleus             |
| ZNF77         | -58.7              | down              | zinc finger protein 77                                    | Nucleus             |
| ZSCAN16       | -4.8               | down              | zinc finger and SCAN domain containing 16                 | Nucleus             |



**Supplementary Table 2 - Top network functions of differentially expressed genes according to Ingenuity Pathway Analysis.**

|   | <b>NETWORK FUNCTIONS</b>                                                               |
|---|----------------------------------------------------------------------------------------|
| 1 | Organismal Injury and Abnormalities, Reproductive System Disease, Cellular Development |
| 2 | Cell Signaling, Cellular Movement, Dermatological Diseases and Conditions              |
| 3 | Cell Death, Inflammatory Response, Cardiovascular Disease                              |
| 4 | Dermatological Diseases and Conditions, Immunological Disease, Inflammatory Disease    |
| 5 | Cancer, Reproductive System Disease, Cardiac Inflammation                              |

Supplementary Figure 1. Network schematics of up-regulated cellular signaling pathways after cold plasma application.

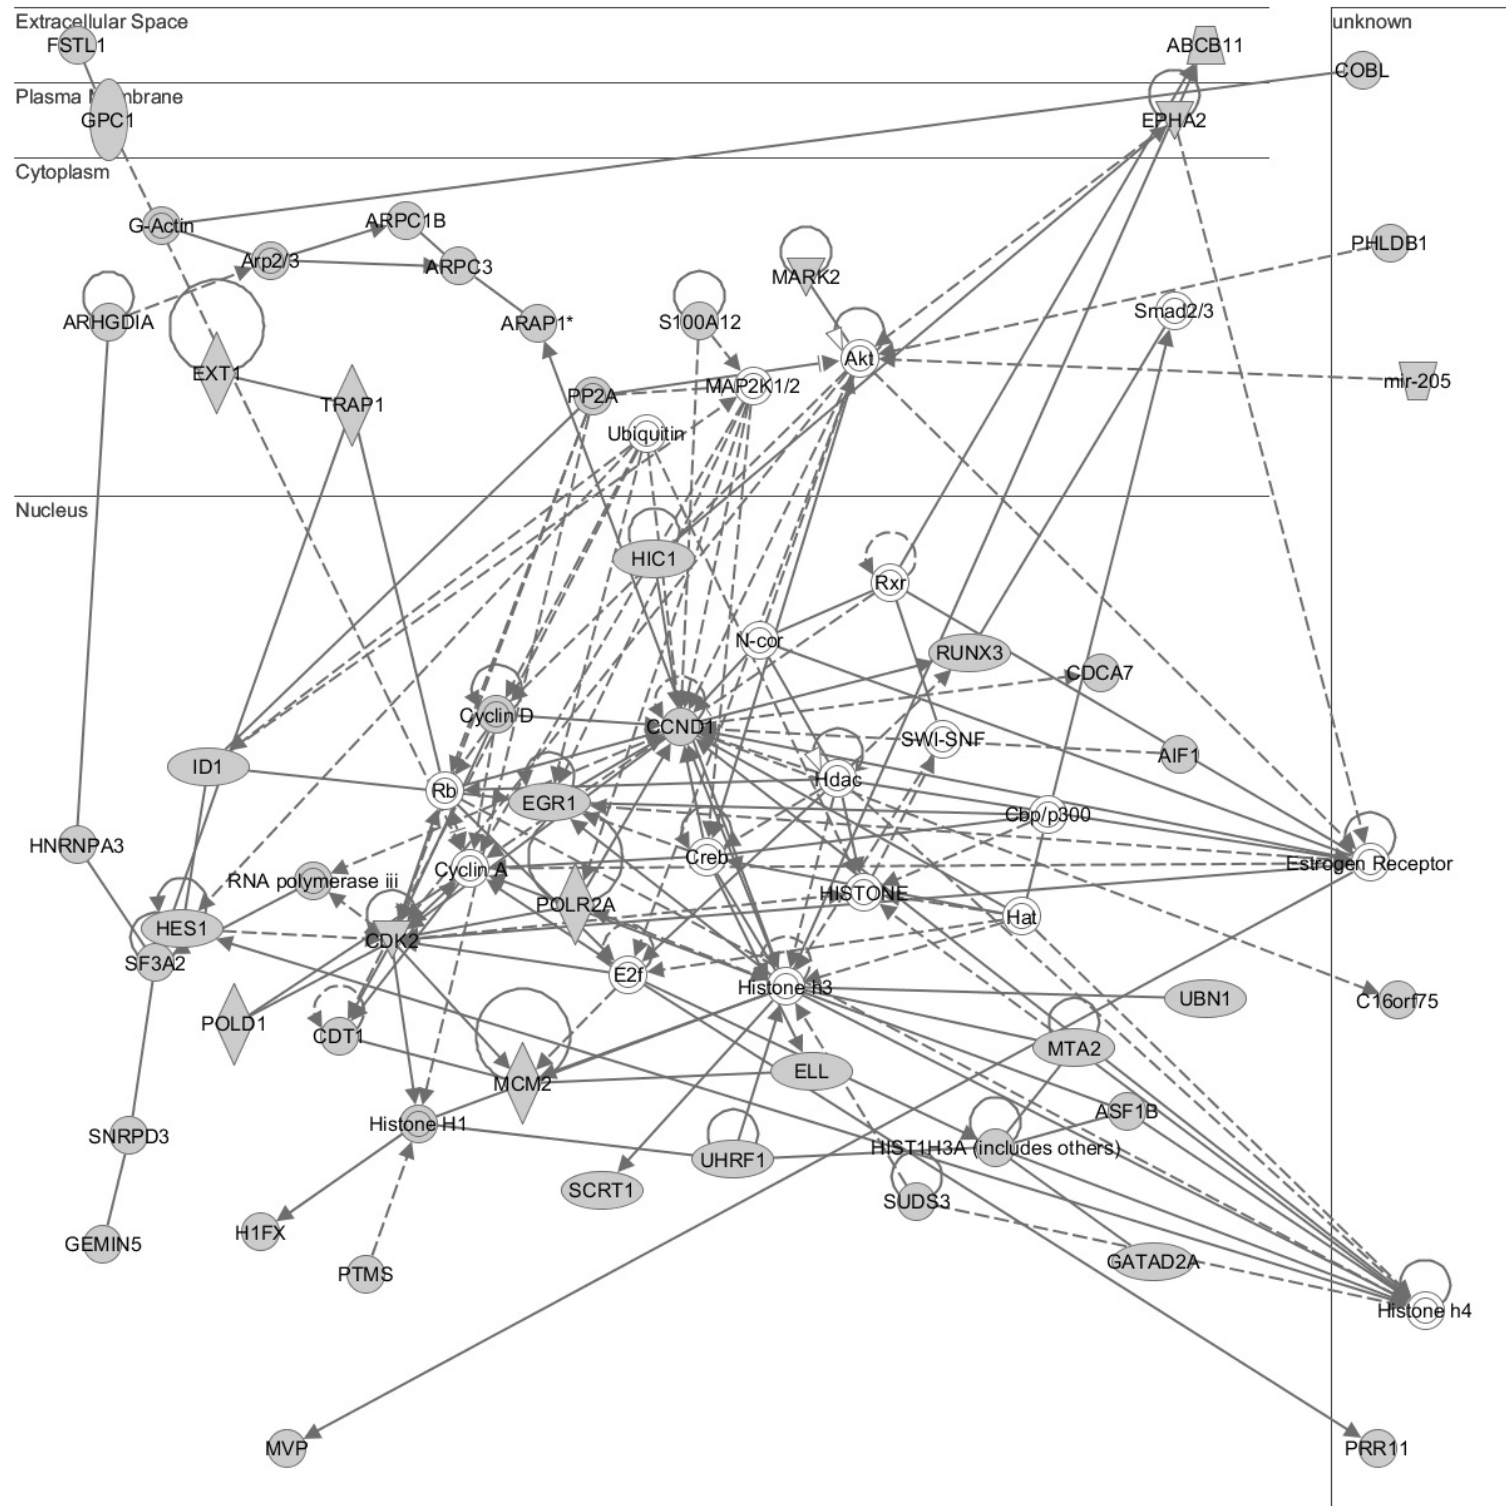

Supplementary Figure 2. Network schematics of down-regulated cellular signaling pathways after cold plasma application.

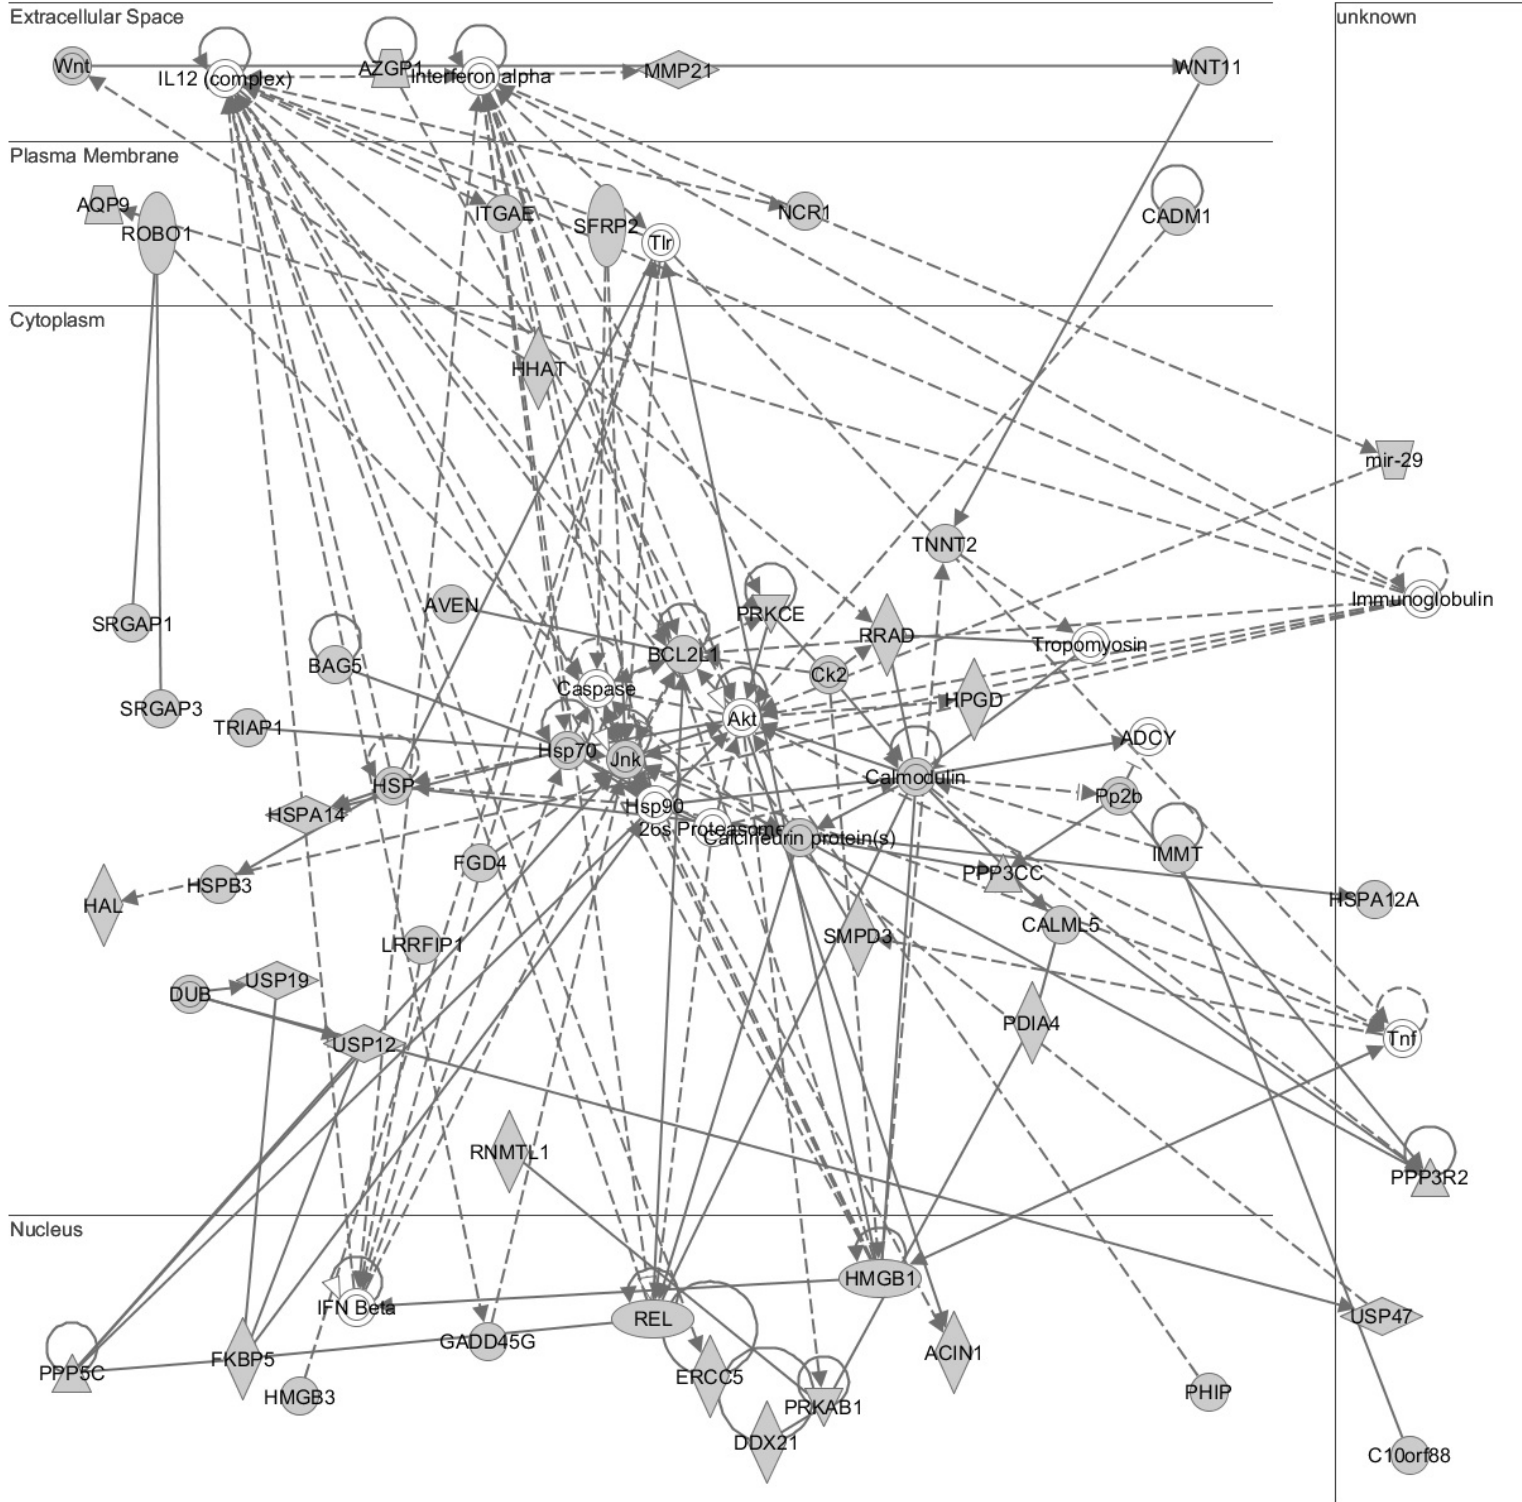

Supplement: bjc2011386x1.pdf [file bjc2011386x1.pdf]
